# Predictability of cortico-cortical connections in the mammalian brain

Ferenc Molnár<sup>a</sup>, Szabolcs Horvát<sup>b,c,d</sup>, Ana R. Ribeiro Gomes<sup>e,f</sup>, Mária Ercsey-Ravasz<sup>g,h</sup>, Kenneth Knoblauch<sup>e</sup>, Henry Kennedy<sup>e,i,j,1</sup>, Zoltan Toroczkai<sup>a,1</sup>

<sup>a</sup>Department of Physics University of Notre Dame, Notre Dame, IN 46556, USA;

<sup>d</sup>Center for Systems Biology Dresden, Pfotenhauerstr. 108, 1307 Dresden, Germany;

<sup>e</sup>Max Planck Institute for Cell Biology and Genetics, Pfotenhauerstr. 108, 1307 Dresden, Germany;

<sup>f</sup>Max Planck Institute for the Physics of Complex Systems, Nöthnitzerstr. 38, 01187 Dresden, Germany;

<sup>g</sup>Univ Lyon, Université Claude Bernard Lyon 1, INSERM, Stem Cell and Brain Research Institute U1208, 69500 Bron, France;

<sup>h</sup>Section on Cognitive Neurophysiology and Imaging, Laboratory of Neuropsychology, National Institute of Mental Health, National Institutes of Health, Bethesda, MD, 20892, USA;

<sup>g</sup>Faculty of Physics, Babeş-Bolyai University, 400084 Cluj-Napoca, Romania;

<sup>h</sup>Transylvanian Institute of Neuroscience, 400157 Cluj-Napoca, Romania;

<sup>i</sup>Institute of Neuroscience, Center for Excellence in Brain Science and Intelligence Technology, Chinese Academy of Sciences, Shanghai 200031, China;

<sup>j</sup>Shanghai Center for Brain Science and Brain-Inspired Intelligence Technology, Shanghai 200031, China;

<sup>1</sup>To whom correspondence may be addressed. Email : [toro@nd.edu](mailto:toro@nd.edu) , [henry.kennedy@inserm.fr](mailto:henry.kennedy@inserm.fr)

ORCID:

Z.T. : <https://orcid.org/0000-0002-6602-2849> ; Sz.H. : <https://orcid.org/0000-0002-3100-523X>

M. E-R. : <https://orcid.org/0000-0003-4428-9953>

**Classification:** Neuroscience

**Keywords:** machine learning | neuroanatomy | neocortex | primate | rodent.

## Author Contributions

FM and ZT designed the research, FM wrote all the prediction algorithms and ran the simulations, SzH, ARG and ME-R contributed to the computational and data analysis, ARG, KK and HK collected and provided the experimental datasets, ZT and FM wrote the paper and all authors contributed to editing the paper.

## This PDF file includes:

Main Text ()

Figures 1 to 7

Tables 1 to 3

Materials and Methods

**Supplementary Information** (17 pages) contains Figures S1-S11 and Tables S1-S3, References.

51 **Abstract (175/250 words)**

52 Despite a five-order magnitude range in size, the mammalian brain exhibits many shared  
53 anatomical and functional characteristics that should translate into cortical network commonalities.  
54 Here we develop a framework employing machine learning to quantify the degree of predictability  
55 of the weighted interareal cortical matrix. Data were obtained with retrograde tract-tracing  
56 experiments supplemented by projection length measurements. Using this framework with  
57 consistent and edge-complete empirical datasets in the macaque and mouse cortex, we show that  
58 there is significant amount of predictability embedded in the interareal cortical networks of both  
59 species. At the binary level, links are predictable with an Area Under the ROC curve of at least 0.8  
60 for the macaque. At the weighted level, strengths of the medium and strong links are predictable  
61 with at least 85-90% accuracy in mouse and 70-80% in macaque, whereas weak links are not  
62 predictable in either species. These observations suggest that the formation and evolution of the  
63 cortical network at the mesoscale is to a large extent, rule-based, motivating further research on  
64 the architectural invariants of the cortical connectome.

65  
66

## 67 Introduction

68

69 Information in the brain is encoded via the temporal patterns of signals generated by a  
70 network of distributed neuronal assemblies (Hebb, 1949; McCulloch and Pitts, 1943),  
71 whose organization has been shown to be strongly determined by its weighted  
72 connectivity and spatial embedding (Knoblauch et al., 2016; Markov et al., 2013a). This  
73 contrasts with technological information networks, where information including the  
74 destination address is encoded into packets and routed via switches, with the network  
75 structure serving merely as propagation backbone. In comparison, the structure of brain  
76 networks is considerably more complex and forms an integral part of its processing  
77 algorithm, the deciphering of which crucially hinges on the details of its connectome  
78 (Sporns et al., 2005). This is supported, for example, by the observation that many  
79 neurodegenerative diseases stem from neuronal pathway disruptions (Delbeuck et al.,  
80 2007; Friston and Frith, 1995; Peters et al., 2013; Silva et al., 2015).

81

82 Despite being fundamental for understanding the brain in health and disease, there is  
83 limited knowledge of cortical circuitry, which at the microscale is presently intractable, due  
84 to the staggering size of its numbers of nodes (neurons) and connections (Frégnac and  
85 Bathellier, 2015). What is tractable with current technology, however, is the investigation  
86 of the meso-scale, interareal network corresponding to the pathways between functionally  
87 defined areas, addressed in ongoing electrophysiology and whole brain imaging efforts to  
88 understand cognitive functions (Mesulam, 2012). While the full interareal network (FIN) is  
89 currently unavailable for any mammal, it is obtainable in the foreseeable future, although,  
90 nevertheless, requiring highly specialized laboratories.

91

92 Among the empirical approaches, retrograde tract-tracing has emerged as a reliable, high-  
93 resolution method to trace neuronal pathways (Köbber et al., 2000; Lanciego and  
94 Wouterlood, 2011). Compared to anterograde techniques, the major advantage of  
95 retrograde tract-tracing is that counts of labeled cells provide a reliable metric of  
96 connection strength, yielding a weighted, directed and spatially embedded, physical  
97 network of connections between brain areas (Gămănuț et al., 2018; Majka et al., 2020;  
98 Markov et al., 2014; Zingg et al., 2014). In these experiments a single area (referred to as  
99 the target area) is injected with a tracer, which then back-labels the cell-bodies of neurons  
100 with terminals ending in the target area. Areas external to the target area housing labeled  
101 neurons are referred to as source areas. The weight of an interareal connection from area  
102  $j$  to area  $i$ , defined via the counts of labeled neurons, is recorded as the Fraction of  
103 Labeled Neurons  $FLN_{ij}$  found in area  $j$  ( $j \neq i$ ), when injecting into area  $i$ .

104

105 Existing retrograde tracing datasets do not have full network connectivity information; they  
106 do provide edge-complete subgraphs, i.e., networks formed by a subset of vertices whose  
107 connectivity within this subset is fully known. These studies show that interareal cortical  
108 networks (Majka et al., 2020) are not random graphs, but complex networks with  
109 characteristic structural features (Ercsey-Ravasz et al., 2013; Gămănuț et al., 2018;  
110 Horvát et al., 2016; Theodoni et al., 2020). Moreover, interareal networks appear to be in  
111 a class of their own when compared to other real-world complex networks, including  
112 technological information networks (Milo et al., 2004). One of the most distinguishing  
113 feature of interareal networks is their high density of binary connectivity (connections  
114 existing or not), i.e., containing a large fraction of the maximum number of possible  
115 connections: 0.66 for the macaque (Markov et al., 2011) and 0.97 for the mouse (Gămănuț  
116 et al., 2018). At such high values, and especially for the mouse, network specificity is

117 achieved by the profiles of connection weights (Gămănuț et al., 2018). The connectivity  
118 profile of a cortical area is the set of connections and their weights, which has been  
119 hypothesized to constrain its functional properties thereby reflecting its specialization  
120 (Bressler, 2004; Bressler and Menon, 2010; Markov et al., 2011).

121  
122 Studies of existing, self-consistent tract-tracing datasets (Kennedy et al., 2013) reveal the  
123 action of a simple rule in both mouse and monkey, the so-called Exponential Distance  
124 Rule (EDR), which significantly constrains the structure of the interareal networks (Ercsey-  
125 Ravasz et al., 2013; Theodoni et al., 2020; Horvát et al., 2016; Markov et al., 2013a). The  
126 EDR expresses the empirical observation that axonal connection probability decays  
127 exponentially with projection length,  $p(l) \sim e^{-\lambda l}$ , where  $\langle l \rangle = 1/\lambda$  is the average axonal  
128 projection length ( $\lambda_{\text{exp}}^{\text{mac}} = 0.19 \text{ mm}^{-1}$ ,  $\lambda_{\text{exp}}^{\text{mus}} = 0.78 \text{ mm}^{-1}$ ). With the EDR, a one-parameter  
129 ( $\lambda$ ), Maximum Entropy Principle based, generative model for interareal networks captures  
130 many binary, and some weighted features of the cortical network, including the frequency  
131 distribution of 3-motifs, global and local efficiencies, core-periphery structures, eigenvalue  
132 distributions and connection similarity profiles (Ercsey-Ravasz et al., 2013; Horvát et al.,  
133 2016; Theodoni et al., 2020; Song et al., 2014).

134  
135 Interareal connections and the network structure are the evolutionary consequences of  
136 genetic pre-specification and interactions with the environment (Buckner and Krienen,  
137 2013). Although there is network variability between individuals (Gămănuț et al., 2018;  
138 Markov et al., 2014), one can speculate that there are universal features common to all  
139 individuals within species and across species (Goulas et al., 2019; Margulies et al., 2016;  
140 Mota et al., 2019). This is supported, for example, by the cross-species consistency of the  
141 aforementioned EDR (Horvát et al., 2016; Theodoni et al., 2020) and the similarity of  
142 topographical ordering of the functional areas on the cortical mantle (Krubitzer, 2009).

143  
144 Here we refer to the above-mentioned universal features, as *architectural network*  
145 *invariants*, which we argue, imply predictability of networks. To study this issue in a more  
146 general and systematic fashion, we turn to data prediction and machine learning methods.  
147 We show that these techniques can be used to assess the degree of predictability of brain  
148 networks and are therefore also usable for network imputation, i.e., to predict missing  
149 network data. Naturally, the accuracy of imputation is determined by the degree of  
150 predictability inherent in the data. Moreover, we argue that predictability methods can also  
151 be *used* as tools to study structure-function relationships in these networks. Overall, these  
152 methods address the following questions: “Are certain parts of the network more  
153 predictable than others?”, “How much information do individual parts of the network carry  
154 about the network as a whole?”, “How well can missing connections be predicted?”, “How  
155 does heterogeneity in predictability relate to cortical function and behavioral features of  
156 the species?”, “How does predictability in an order (e.g., primate) compare to predictability  
157 in another (e.g., rodent)?” and “Can we use predictability as a guide for further  
158 experiments?”

159  
160 Two key methodological aspects of our approach are to be emphasized. First,  
161 predictability is primarily an inherent property of the data itself and not of the algorithm  
162 used. Although the quality of prediction algorithms varies wildly, even the best algorithm  
163 cannot and should not “predict” information that is not there (for example, in the case of  
164 two pieces of mutually independent data A and B). Secondly, great care has to be taken  
165 in order to avoid overfitting, that is, fitting to noise in the data, as this leads to loss of  
166 generalization power and erroneous conclusions.

## 167 Results

168

169 First, we introduce the datasets in our study then give a brief summary of the prediction  
170 methods used and how they are adapted to work with retrograde tract-tracing datasets.  
171 We then present our main results on network predictability using cross-validation both at  
172 the binary and weighted levels, along with a comparison of predictability between rodent  
173 and primate cortical networks.

174

175 **Data description.** We rely on two retrograde tract-tracing datasets, one for the macaque  
176 (mac) and the other for the mouse (mus). Both are cortico-cortical connectivity databases  
177 created with consistent methodology, having most of the data published in (Gămănuț et  
178 al., 2018) in the mouse and a more limited dataset based on 29 injection areas in a 91-  
179 area atlas in (Markov et al., 2014) on the macaque. The mouse dataset  $G_{19 \times 47}^{\text{mus}}$  is a matrix  
180 of FLN values  $FLN_{ij}$  for 19 injected target areas ( $j$  is a source, projecting into target  $i$ ), in  
181 a 47-area parcellation. The current macaque dataset  $G_{40 \times 91}^{\text{mac}}$  contains the original data for  
182 the 29 areas published in (Markov et al., 2014) and the weighted connections for an  
183 additional 11 areas, bringing the total of injected areas to 40 in a 91-area parcellation.  
184 Both datasets are provided in the Supplementary Information (SI). The full interareal  
185 networks (FIN), which are not available for either species, would be the matrices  $G_{47 \times 47}^{\text{mus}}$   
186 and  $G_{91 \times 91}^{\text{mac}}$ , respectively. Additionally, our datasets contain all pairwise distances along  
187 estimated shortest paths avoiding anatomical obstacles, between the area barycenters,  
188 recorded in the matrices  $D_{47 \times 47}^{\text{mus}}$  and  $D_{91 \times 91}^{\text{mac}}$ , respectively, also provided in the SI.

189

190 Repeat injections across individuals allow an assessment of the consistency of the set of  
191 areas and their FLN values (Gămănuț et al., 2018; Markov et al., 2011). Due to the high  
192 sensitivity of the tracers, every injection reveals all the areas that project into the injected  
193 target area and thus, the FLN matrix  $G_{T \times N}$  is a row submatrix of the FIN  $G_{N \times N}$ . That is, we  
194 either know the full row (corresponding to a target area) or not at all. This is illustrated in  
195 **Figure 1A** where, for simplicity, we order the rows such that the first  $T$  rows represent the  
196 targets, in the full  $G_{N \times N}$  matrix.

197

198 **Data preprocessing.** In order to use the available input data, it needs to be organized in a  
199 format appropriate for the prediction algorithms (described below). We preprocess the  
200 FLN matrix by computing the base-10 logarithm of all its non-zero entries (Markov et al.,  
201 2013a) (values range in order of magnitude from  $10^{-7}$  to 1) then shifting the values by  
202 adding 7 to them:  $w_{ij} = 7 + \log_{10}(FLN_{ij})$ . The zero entries are left as zeroes. The resulting  
203 matrix has values between 0 and 7 (in both species). The 0 entries correspond to non-  
204 links (i.e., non-connected node pairs) and elements on the main diagonal, non-zero entries  
205 to actual links. The macaque distance matrix range (0, 58.2 mm), and the mouse  
206 (0, 12 mm). For both species the distance feature matrix  $D_f = 31 (D / \max D)$  with values  
207 ranging from 0 to  $31^1$ .

208

209 **The link prediction framework.** Link prediction refers to inferring links from observed  
210 network data (Liben-Nowell and Kleinberg, 2007; Clauset et al., 2008; Lü and Zhou, 2011).  
211 This can be done at the binary (predicting only if a link exists/1 or not/0) or weighted levels  
212 (predicting the associated weight). Binary level predictors also are known as classifiers,  
213 whereas weighted link predictors are essentially regressors. There are two main families  
214 of prediction methods for static networks, Classical Link (CL) predictors and Machine

---

<sup>1</sup> This value gives a good resolution on the distance range, but other similar values can also be used.

215 Learning (ML) predictors. CL predictors, used extensively in social networks, are  
216 classifiers that forecast links at the binary level based on either node neighborhood  
217 information (local) or path information (global). This information is formulated into a  
218 *predefined model* that generates a score  $score(u, v)$  for every ordered node pair  $(u, v)$ ,  
219 which is then used to make the prediction. ML predictors can be used as classifiers (for  
220 binary prediction) or as regressors (for weighted prediction). They predict based on  
221 *learning* from samples with a given set of features. A feature is a vector of values (feature  
222 vector) quantifying what we know about the relationship of a node pair. We train an ML  
223 predictor in a supervised fashion, by providing the feature vectors computed for the node  
224 pairs in the training set and using the “ground truth” data about the pairs’ connectivity. The  
225 classifier then creates a model *autonomously* that best fits the given training set with the  
226 given feature vectors, which is then tested against the ground truth in the test data and  
227 the classifier’s performance is evaluated. Thus, the main difference between CL and ML  
228 is that we impose the model in CL, whereas it is learnt in ML. However, for both CL and  
229 ML, the information on which the prediction is based (scores and feature vectors) has to  
230 be computable *for all pairs in an identical fashion*, which limits the types of predictors that  
231 can be used for retrograde tracing datasets. In particular, for CL, path-based predictor  
232 models such as PageRank, Katz score, and Shortest Path score are effective when  
233 random links exist adjacent to the link (or non-link) to be predicted. However, in retrograde  
234 tracing datasets we are forced to select injected areas as the basis for predictions, but  
235 there are no paths into some of the vertices of the links to be predicted (i.e., the remaining  
236 areas that were not injected), thus excluding path-based predictors. For both CL and ML,  
237 we can only use information on out-going links, being the only type of information  
238 commonly available to all node pairs, see **Figure 1B**.

239  
240 The performance of both classifiers (CL, ML) and regressors (ML) is evaluated using  
241 cross-validation techniques. This separates the available data with ground truth value into  
242 two sets: a training set and a test set. The former is used as input information for the  
243 predictor, which based on that, makes predictions for links in the test set, which is then  
244 compared to the ground truth. One of the two main approaches is the  $k$ -fold cross-  
245 validation, used here, which splits the data into  $k$  equal parts, using in one iteration one of  
246 the parts for the test set and the other  $k - 1$  parts for training, then this is repeated for  
247 every combination of test/training split. Performance metrics are then averaged. To avoid  
248 correlations with any predetermined ordering of the input data we randomize the ordering  
249 of the target areas in the FLN matrices<sup>2</sup> before splitting it into  $k$  parts. We then compute  
250 the corresponding averages over all these randomized realizations and all folds within. An  
251 alternative approach is Monte Carlo cross-validation, which we found gave very similar  
252 results to  $k$ -fold cross-validation.

253  
254 For classifiers we use the standard receiver operating characteristic (ROC) curve and the  
255 corresponding single scalar metric, the area under the ROC curve (AUC) as performance  
256 metrics. The ROC shows the true positive rate (TPR) plotted against the false positive rate  
257 (FPR), obtained by moving the threshold value that distinguishes positive and negative  
258 predictions. A perfect classifier has 100% TPR and 0% FPR and the ROC curve fills the  
259 top left corner of the unit square; a random predictor has 50% TPR and 50% FPR with the  
260 ROC following the main diagonal of the unit square, whereas anything below the main  
261 diagonal implies an invalid predictor. The ROC curve also has a specific point that  
262 corresponds to the maximum prediction accuracy. Accuracy is defined as the number of  
263 correctly predicted links and non-links divided by the number of all predictions ( $ACC = (TP +$

---

<sup>2</sup> The training of ML predictors can be sensitive to the order in which the training data is supplied.

264 TN) / (TP + TN + FP + FN)), where TP, TN, FP, and FN are the number of true positive, true  
265 negative, false positive, and false negative predictions, respectively. This point is determined  
266 numerically for each ROC curve, and this threshold is used to make the binary predictions  
267 during cross-validation. For weighted predictors there are no ROC curves. Instead, we use  
268 the mean absolute error (MAE) or the relative MAE (RMAE) between predicted and actual  
269 links weights (using RMSE, i.e., root-mean-square error gives very similar results).

270  
271 Cross-validation helps to quantify not only how well a particular algorithm predicts the  
272 presence or absence of links but also to quantify the degree of predictability in the data,  
273 especially when comparing across ML algorithms, for both binary and weighted  
274 predictions. Note, predicting the connectivity status of node pairs for which there is no  
275 ground truth (imputation task), is only meaningful if the cross-validation results indicate  
276 significant predictability in the data. Here we present predictability results (cross-  
277 validation) in both species using both CL and ML algorithms at binary and weighted levels.  
278 Link imputation will be presented in a subsequent publication.

279

## 280 **Network predictability in the macaque and mouse**

281

282 **Binary link prediction.** CL algorithms generate a score  $score(u, v)$  for every node pair  
283  $(u, v)$  based on link predictor formulas that express various types of network information.  
284 These formulas, used typically in social networks, provide summations over nodes with  
285 incoming links from both  $u$  and  $v$ . Since retrograde tracing data such as the ones used  
286 here only reveal the incoming links to the target areas, the predictor formulas must be  
287 modified accordingly (shown in Materials and Methods).

288

289 In the case of ML classifiers, we need to specify the feature vectors. **Figure 2** shows the  
290 macaque ROC curves for ML classifiers (solid lines) based on full information feature  
291 vectors, namely, feature vectors composed of both FLN values and distances. We have  
292 tested several other combinations of data for feature vectors and found the results to be  
293 invariably inferior to that based on full information (SI Figures S1-S4). ML classifiers other  
294 than those shown in **Figure 2** have also been tested, such as DecisionTree, AdaBoost  
295 and NaïveBayes but overall had a performance inferior to those shown here. It is clear  
296 that with the exception of JA (modified Jaccard), the CL predictors do not perform as well  
297 as the four ML classifiers. The ML classifiers were tested against overfitting (SI Figures  
298 S6, S7 show the case of the MLP). They were also tested using different  $k$  values for the  
299 number of folds (SI Figure S8).

300

301 The approximately 80% AUC obtained consistently by the top performing classifiers,  
302 indicates high predictability embedded in the macaque interareal network, suggesting the  
303 existence of architectural invariants and corresponding mechanisms (**Figure 2**). This  
304 analysis cannot be applied to the mouse dataset, (see the ROC curves in the SI Figure  
305 S9), due to its ultra-high density of 97%. This density causes a strong bias and prevents  
306 the calculation of a meaningful ROC curve, because the classifiers have only 3% true  
307 negatives to learn from, meaning that only weighted predictions can be made in the mouse  
308 brain, presented in the next section.

309

310 **Figure 3** shows individual link prediction errors in the macaque data for all the links with  
311 a corresponding ground truth value (lighter colors correspond to smaller errors). A  
312 prediction (link existing/1 or not/0) was obtained for every  $k$ -fold run in all area-pairs  $i$ ,  
313 averaged over 100 randomized  $k$ -fold run predictions, generating a prediction  $\langle y_{\text{pred}}(i) \rangle$ .

314 The error is calculated via  $error(i) = |y_{true}(i) - \langle y_{pred}(i) \rangle|$ , where  $y_{true}(i) \in \{0,1\}$  is the  
315 true binary link value. The inset in **Figure 3A** is a matrix of link prediction error  
316 heterogeneity by cortical brain regions. This shows that links from the frontal to temporal  
317 regions are less predictable (bottom row, second column), while links from frontal to  
318 cingulate (and prefrontal) are more predictable, etc. In addition, links within functional  
319 regions are more predictable than between regions (main diagonal of the small matrix),  
320 suggesting that predictability is possibly distance and thus weight dependent, since from  
321 EDR, we know that short/long connections are preponderantly strong/weak. **Figure 3B,C**  
322 show how prediction errors behave as a function of the link weights and distance  
323 demonstrating the action of a distance rule on predictability.

324  
325 In order to disentangle the effect of distance/weight, we examined predictions based only  
326 on links of certain strengths: Strong only,  $w_{ij} \geq 5$ ; Medium-&-Strong,  $w_{ij} \geq 3$ ; Medium-&-  
327 Weak,  $w_{ij} \leq 5$  and Weak only,  $w_{ij} \leq 3$ . The sizes of these weight groups are: 494 links  
328 for Strong, 1600 links for Strong-&-Medium, 3146 links for Medium-&-Weak and 2040 links  
329 for Weak. **Figure 4** clearly shows that weak links are not predictable at the binary level  
330 (panel D) implying that the weak (thus long-range) links carry no information about each  
331 other. This is a significant observation that we revisit below, in our weighted prediction  
332 analysis as well. The maximum binary predictability is within the Strong-&-Medium group.  
333 The Strong group has a somewhat weaker predictability, possibly because that is the  
334 smallest set to learn from and the presence of some strong links with high unpredictability  
335 (red circles in **Figure 3A**). One of them,  $V4 \rightarrow 8l$  is part of a strong loop, discussed in the  
336 literature (Markov et al., 2013b, 2013a; Vezoli et al., 2021). Note that these are the links  
337 with the highest prediction errors within the Strong group, *only*.

338  
339 **Weighted link prediction and comparisons between mouse and macaque.** In order  
340 to predict the link weights, we need to turn to supervised regression methods. This  
341 excludes CL algorithms as they are designed uniquely for binary link predictions. Since all  
342 our ML classifiers are available as regression algorithms as well, they can be readily used  
343 for weighted link prediction. The same feature vectors as for binary classifiers are used  
344 but the ground truth now is the actual link weight,  $w_{true}$ . In terms of evaluating the  
345 performance and the amount of predictability inherent in the network we employ the  $k$ -fold  
346 cross-validation scheme as previously, but the performance metric has to be modified  
347 (there are no ROC curves in weighted link prediction). Here we could use the mean  
348 absolute error (MAE) obtained as the absolute value of the difference between the  
349 predicted and the actual weight  $|\Delta w| = |w_{pred} - w_{true}|$ , averaged over the 100  $k$ -fold  
350 predictions. Since FLN values vary over orders of magnitude, the MAE of a weak link is  
351 not easily comparable to that of a strong link. In order to take this into account, we employ  
352 the relative MAE (RMAE), which is the MAE divided by the ground truth strength of the  
353 predicted link,  $|\Delta w|/w_{true}$ . Thus, the RMAE value is the fraction of the link weight that is  
354 not predicted. For example, an RMAE of 0.2 means that 80% of the link weight  $w$  was  
355 predicted and 20% was not. An RMAE of 2 reflects an error of 200% compared to the true  
356 link strength. As for the binary prediction, comparing the performance of several  
357 classifiers, GB, KNN, MLP, RF come out as the four top predictors.

358  
359 These regressors work by minimizing a cost function (such as the root-mean-square error  
360 RMSE) over the training set, when finding the best-fitting model, which in turn, is used to  
361 predict the test set. Analysis of prediction residuals provides both an efficient test of the  
362 capacity of the predictor to capture the signal part of the data as well as a means of ranking  
363 performance. This analysis shows that GB performs somewhat better compared to RF,

364 MLP or KNN. SI Figure S10 shows the results from the analysis of the prediction residuals  
365 for the GB algorithm. A featureless scatter plot of the residuals vs. predicted values as  
366 shown in SI Figure S10C indicates that the signal portion of the data has been well learned  
367 by the predictor.  
368

369 For simplicity, in the following we show predictions based only on GB. **Figure 5A,B** shows  
370 the prediction error (RMAE) matrices for both the macaque and mouse. Note the strong  
371 similarity of the patterns between **Figure 5A** and **Figure 4A** for the macaque. At the  
372 weighted level as well, some of the links are more predictable than others. The matrices  
373 at the regional level, presented in **Figure 5C,D** also show heterogeneity: for example,  
374 across species, temporal to occipital are highly predictable, whereas occipital to frontal  
375 are less so. Globally, the mouse network appears more predictable than the macaque  
376 (overall lighter matrices for the mouse). This is further demonstrated in **Figure 6** where  
377 we plot RMAE values as function of link weight as well as a function of link projection  
378 lengths (distance). While in both species, weaker links are harder to predict, comparing  
379 (A) to (C) we see that the medium-to-strong links are much more predictable in the mouse  
380 than in the macaque, but the situation is reversed for the weakest links. Similarly, long-  
381 range links are harder to predict in both species than shorter ones. Overall, weighted links  
382 are more predictable in the mouse than in macaque.  
383

384 We quantify global link predictability, and by link weight classes in **Table 1**, for both  
385 species. Predictions (3-fold cross-validation) were made on the full dataset (including links  
386 with non-zero weight and also non-links) using the GB algorithm and errors computed and  
387 averaged within the corresponding groups. The RMAE values in **Table 1** show that weak  
388 links are not predicted in either species, whereas the stronger links are better predicted in  
389 both species. The stronger links are in general two-fold more predictable in the mouse  
390 than in the macaque. The non-links, however, are better predicted in the macaque, likely  
391 due to the fact that there are only 3% non-links in the mouse dataset. Since the larger  
392 errors are associated with the non-links, we performed the predictability analysis also on  
393 a reduced dataset, with only actual links included (non-links excluded). That is, we trained  
394 the ML algorithms only on the portion of the matrix with non-zero link-weights. The  
395 predictability results are shown in SI Table S3. Except for the weak links, predictability  
396 improved in general, with mouse links being overall 1.5 times more predictable than the  
397 macaque ones.  
398

399 **Scaling of predictability with input data, leave-one-out analysis.** Another important  
400 issue is the scaling of predictability with the amount of input, i.e., the amount of data used  
401 for training. To investigate this question, we consider a random subset of  $m$  areas from all  
402 the targets, leave one *target area* out (of this set of  $m$ ), then make a prediction based on  
403 the rest for all the out-links of this one area. We then repeat this with every member of this  
404 subset, obtaining predictions for all of them. These are then compared with the ground  
405 truth and the relative error is calculated. We call this the *internal relative error* (internal to  
406 the selected subset). We then repeat this random selection of  $m$  subsets 500 times and  
407 average the obtained relative errors for all the targets, shown in **Figure 7**. An interesting  
408 conclusion from **Figure 7** is that the ML predictors are able to learn the structure in the  
409 data fairly quickly for the medium to strong links, and the improvement after that is  
410 relatively small, although more significant for the weak links (note the log-scale on the y-  
411 axis). Another way of studying the scaling of errors with input data size is described in the  
412 caption of SI Figure S12, which shows prediction errors for areas external to the  $m$   
413 selected. The two plots are not significantly different, leading to the same conclusion.  
414

## 415 Discussion

416 Using machine learning methods, we demonstrated that the network of the mammalian  
417 cortex contains significant structural predictability, suggesting that the formation and  
418 evolution of the cortex is to a good extent rule based, at the mesoscale level. This further  
419 motivates the search for universal mechanisms of brain network formation and evolution,  
420 within the mammalian order.

421  
422 The literature on link prediction in the brain is fairly limited. To the best of our knowledge,  
423 the earliest link prediction effort in the context of brain neuronal networks goes back to a  
424 1998 paper by Jouve et al. (Jouve et al., 1998), which uses the frequency of directed  
425 transitive triples to predict missing links at the binary level (existing or not), in an early  
426 dataset on the macaque visual system (Felleman and Van Essen, 1991). The next brain  
427 link prediction papers appear almost a decade later, which incorporate additional  
428 topological and spatial features (Costa et al., 2007; Nepusz et al., 2008), both based on  
429 the CoCoMac database (Kötter, 2004), with the latter using a stochastic graph fitting  
430 method to handle the uncertainties in the data. Several other publications followed these  
431 papers (Hoff, 2009; Cannistraci et al., 2013; Hinne et al., 2017; Røge et al., 2017; Chen  
432 et al., 2020; Shen et al., 2019), but all (including the earliest three) are based on pre-  
433 conceived network models whose parameters are fitted to the data, and then used to make  
434 predictions (usually at a binary level) on missing links. These network models quantify the  
435 belief that the existence or absence of a link is largely determined by some summary  
436 network statistics on the existing data. One problem with this approach is that it imposes  
437 specific relationships that the modeler believes to be relevant. Another is that the summary  
438 statistics are obtained on an incomplete dataset, which inherently biases these statistics,  
439 a bias which is then built into the prediction. A further bias present in almost all the previous  
440 link prediction papers is that they are based on network models from the field of social  
441 networks. However, brain neuronal networks are quite different from social networks in  
442 many aspects and thus social networks-based models would have limited practical  
443 applicability in the brain. Here we compared the performance of the social science  
444 inspired, model-imposed link predictors (CL) with machine learning based methods (ML)  
445 that learn the structure from the data, without imposing specific models or assumptions.  
446 Our results show that the latter approach achieves significantly better predictions than the  
447 model-based predictors. Another reason for the poor performance of most CL predictors  
448 is the fact that the CL formulas use only a single weight value and not multivariate  
449 information about a link (such as weights plus distance) efficiently, unlike ML algorithms  
450 (using only distances for CL, gives worse performance, see the SI Figure S5). The Jaccard  
451 coefficient is the only successful CL predictor because its formula happens to agree with  
452 a property of the link weight distributions in the brain. More precisely, it is due to the fact  
453 that the formula for the Jaccard index correlates with the triangle inequality, which holds  
454 for spatial networks and that also happens to be respected by the link weights of the brain,  
455 due to the action of the EDR: if areas A and B are close to each other (strong link) and  
456 area C is far from A (weak link), then C will also be far from B (weak link), mimicked by  
457 the Jaccard index as well.

458  
459 Another significant issue affecting the reliability of predictions is the quality of the dataset.  
460 While the CoCoMac database is one of the largest connectomics databases, it is also a  
461 collation of results from independent studies using different approaches under different  
462 conditions, with significant inconsistencies (Bezgin et al., 2012). Moreover, the CoCoMac  
463 database does not distinguish absent links from links of unknown status, which is a major  
464 source of errors in network modeling (Kennedy et al., 2013). The results generated from

465 the two retrograde tract-tracing datasets in non-human primates (macaque) and rodent  
466 (mouse), both obtained with consistent empirical methodology, allow for interspecies  
467 comparisons (Horvát et al., 2016) of the statistical network properties, using the edge-  
468 complete portions of the datasets. The ML predictions show that weak/long-range links in  
469 general are not predictable in either species, and that these links have little to no  
470 information about each other, at least in terms of link weights and projection distance.  
471 Moreover, they also show that overall, the mouse brain has a more predictable structure  
472 than the macaque (roughly by a factor of two in terms of errors). However, it is somewhat  
473 more difficult to predict the weakest connections in the mouse, than in the macaque  
474 (compare panels A and C in **Figure 6**). Accordingly, one could speculate that the long-  
475 range connections have less specificity in the mouse brain than in the macaque. It is,  
476 however, important to note that these predictability measures are all based on the features  
477 of link weights and projection distances. Including additional, biologically relevant features  
478 such as cell types could lead to a refinement of the predictability analysis presented here.  
479

480 Finally, we recall that the EDR model (Ercsey-Ravasz et al., 2013; Markov et al., 2013a;  
481 Horvát et al., 2016), mentioned in the introduction, captures many features of the cortical  
482 networks in both species. One may ask, what is the amount of predictability in the EDR  
483 model networks themselves, using the same distance matrices as in the data, and the  
484 corresponding, empirically obtained  $\lambda$  decay rates? We find that the top predictors achieve  
485 a slightly better performance on the EDR model networks (an AUC of 0.86, see SI Figure  
486 S11) than on the experimental connectivity data (an AUC of 0.82, see **Figure 2**). The  
487 improved performance in the EDR network is expected, given that these networks are, by  
488 definition, rule-based, with some level of randomness included (Ercsey-Ravasz et al.,  
489 2013).

490  
491 Machine learning methods may also be used as a guide to future neuroanatomical  
492 experiments. For example, if all predictors consistently suggest the existence or absence  
493 of a link where the data indicates the opposite, it may prompt the revision of the empirical  
494 data. Prediction results could also propose optimal injection sites based on the expected  
495 surprise that the data could reveal from such injections. Targets that generate in-links that  
496 are highly similar to the existing data do not add much novelty to the dataset, but areas  
497 with large deviations from the average link predictions may contain significant information  
498 about the specificity of the incoming links into that target. These could correspond, for  
499 example, to the appearance of a novel information processing modality in the brain,  
500 reflecting a significant evolutionary branching event in the history of the species.

## 501 **Materials and Methods**

502

503 **Software packages.** For this work we used Python 3.7 and SciKit-Learn version 0.20.2. The  
504 computation of the ML and CL predictors, cross-validation, and analysis of the results were  
505 implemented in a Python. General calculations and plotting functions are utilizing the standard  
506 packages of NumPy and Matplotlib.

507

508 **Classical Link predictor formulas.** Since we do not have incoming links except for injected  
509 areas, we need to modify slightly the predictor formulas as shown in **Table 2**.

510

511 **Machine learning classifiers and predictors.** All the classifiers used are implemented in the  
512 Python package scikit-learn; “defaults” refer to those parameters provided in version 0.20.2 of the  
513 library. We list the other parameters used for each classifier below.

514

- 515 • K-Nearest Neighbors (KNN):  $n\_neighbors = 5$ ,  $leaf = 30$
- 516 • Decision Tree (DT): defaults
- 517 • Random Forest (RF):  $n\_estimators = 200$ ,  $criterion = 'gini'$
- 518 • Multi-Layer Perceptron (MLP): hidden layer size: 100, convergence error tolerance:  $10^{-6}$ ,  
519 max iterations: 20
- 520 • Gradient Boosting (GB):  $n\_estimators = 100$  (default), which is the number of boosting  
521 stages to perform. GB is robust to over-fitting and larger values typically yield better  
522 performance.  $max\_depth = 7$  (not default). This is the maximum depth of the individual  
523 regression estimators. It limits the number of vertices in the tree.
- 524 • AdaBoost (ADA): defaults
- 525 • Naïve Bayes (NBA): defaults

526

527 **Feature vectors.** Here we summarize the feature vectors that we used to train and test the  
528 classifiers. In each feature function in **Table 3**, the link in question is  $(u, v)$ ;  $A$  denotes the weight  
529 matrix;  $D$  denotes the distance matrix;  $d(x)$  denotes the outdegree of node  $x$  in  $I$ ; and  $I$  denotes  
530 the set of injected areas (nodes). Notice that the feature vectors have various lengths, as some  
531 provide more information than others.

532

533

## 534 **Acknowledgments**

535

536 This work was supported by the National Science Foundation (NSF) grant IIS-1724297  
537 (to Z.T. and H.K.), ANR-17-FLAG-ERA-HBP-CORTICITY (to H.K., M.E.-R., and Z.T.),  
538 ANR-19-CE37- 0025-DUAL\_STREAMS (to K.K.) and by the CNCS-UEFISCDI grant  
539 COFUND-FLAGERA 2-CORTICTY (to M.E.-R).

540

541

## 542 **References**

543

544 Bezgin, G., Vakorin, V.A., van Opstal, A.J., McIntosh, A.R., and Bakker, R. (2012).  
545 Hundreds of brain maps in one atlas: registering coordinate-independent primate neuro-  
546 anatomical data to a standard brain. *NeuroImage* 62, 67–76.

547 Bressler, S.L. (2004). Inferential constraint sets in the organization of visual expectation.  
548 *Neuroinformatics* 2, 227–238.

549 Bressler, S.L., and Menon, V. (2010). Large-scale brain networks in cognition: emerging  
550 methods and principles. *Trends Cogn. Sci.* 14, 277–290.

- 551 Buckner, R.L., and Krienen, F.M. (2013). The evolution of distributed association networks  
552 in the human brain. *Trends Cogn. Sci.* *17*, 648–665.
- 553 Cannistraci, C.V., Alanis-Lobato, G., and Ravasi, T. (2013). From link-prediction in brain  
554 connectomes and protein interactomes to the local-community-paradigm in complex  
555 networks. *Sci. Rep.* *3*.
- 556 Chen, Y., Zhang, Z.-K., He, Y., and Zhou, C. (2020). A Large-Scale High-Density  
557 Weighted Structural Connectome of the Macaque Brain Acquired by Predicting Missing  
558 Links. *Cereb. Cortex* 1–19.
- 559 Clauset, A., Moore, C., and Newman, M.E.J. (2008). Hierarchical structure and the  
560 prediction of missing links in networks. *Nature* *453*, 98–101.
- 561 Costa, L. da F., Kaiser, M., and Hilgetag, C.C. (2007). Predicting the connectivity of  
562 primate cortical networks from topological and spatial node properties. *BMC Syst. Biol.* *1*,  
563 1–17.
- 564 Delbeuck, X., Collette, F., and Van der Linden, M. (2007). Is Alzheimer's disease a  
565 disconnection syndrome? Evidence from a crossmodal audio-visual illusory experiment.  
566 *Neuropsychologia* *45*, 3315–3323.
- 567 Ercsey-Ravasz, M., Markov, N.T., Lamy, C., Van Essen, D.C., Knoblauch, K., Toroczka,  
568 Z., and Kennedy, H. (2013). A predictive network model of cerebral cortical connectivity  
569 based on a distance rule. *Neuron* *80*, 184–197.
- 570 Felleman, D.J., and Van Essen, D.C. (1991). Distributed hierarchical processing in the  
571 primate cerebral cortex. *Cereb. Cortex N. Y. N* *1991* *1*, 1–47.
- 572 Frégnac, Y., and Bathellier, B. (2015). Cortical Correlates of Low-Level Perception: From  
573 Neural Circuits to Percepts. *Neuron* *88*, 110–126.
- 574 Friston, K.J., and Frith, C.D. (1995). Schizophrenia: a disconnection syndrome? *Clin.*  
575 *Neurosci. N. Y. N* *3*, 89–97.
- 576 Gămănuț, R., Kennedy, H., Toroczka, Z., Ercsey-Ravasz, M., Van Essen, D.C.,  
577 Knoblauch, K., and Burkhalter, A. (2018). The Mouse Cortical Connectome, Characterized  
578 by an Ultra-Dense Cortical Graph, Maintains Specificity by Distinct Connectivity Profiles.  
579 *Neuron* *97*, 698-715.e10.
- 580 Goulas, A., Majka, P., Rosa, M.G.P., and Hilgetag, C.C. (2019). A blueprint of mammalian  
581 cortical connectomes. *PLoS Biol.* *17*, e2005346.
- 582 Hebb, D.O. (1949). *The Organization of Behavior* (New York: Wiley).
- 583 Hinne, M., Meijers, A., Bakker, R., Tiesinga, P.H.E., Mørup, M., and van Gerven, M.A.J.  
584 (2017). The missing link: Predicting connectomes from noisy and partially observed tract  
585 tracing data. *PLoS Comput. Biol.* *13*, 1–22.
- 586 Hoff, P.D. (2009). Modeling homophily and stochastic equivalence in symmetric relational  
587 data. *Adv. Neural Inf. Process. Syst.* *20 - Proc. 2007 Conf.* 1–8.

- 588 Horvát, S., Gămănuț, R., Ercsey-Ravasz, M., Magrou, L., Gămănuț, B., Van Essen, D.C.,  
589 Burkhalter, A., Knoblauch, K., Toroczkai, Z., and Kennedy, H. (2016). Spatial Embedding  
590 and Wiring Cost Constrain the Functional Layout of the Cortical Network of Rodents and  
591 Primates. *PLOS Biol.* *14*, e1002512.
- 592 Jouve, B., Rosentiehl, P., and Imbert, M. (1998). A mathematical approach to the  
593 connectivity between the cortical visual areas of the macaque monkey. *Cereb. Cortex* *8*,  
594 28–39.
- 595 Kennedy, H., Knoblauch, K., and Toroczkai, Z. (2013). Why data coherence and quality is  
596 critical for understanding interareal cortical networks. *NeuroImage* *80*, 37–45.
- 597 Knoblauch, K., Ercsey-Ravasz, M., Kennedy, H., and Toroczkai, Z. (2016). The Brain in  
598 Space. In *Micro-, Meso- and Macro-Connectomics of the Brain*, H. Kennedy, D.C. Van  
599 Essen, and Y. Christen, eds. (Cham: Springer International Publishing), pp. 45–74.
- 600 Köbbert, C., Apps, R., Bechmann, I., Lanciego, J.L., Mey, J., and Thanos, S. (2000).  
601 Current concepts in neuroanatomical tracing. *Prog. Neurobiol.* *62*, 327–351.
- 602 Kötter, R. (2004). Online retrieval, processing, and visualization of primate connectivity  
603 data from the CoCoMac database. *Neuroinformatics* *2*, 127–144.
- 604 Krubitzer, L. (2009). In search of a unifying theory of complex brain evolution. *Ann. N. Y.*  
605 *Acad. Sci.* *1156*, 44–67.
- 606 Lanciego, J.L., and Wouterlood, F.G. (2011). A half century of experimental  
607 neuroanatomical tracing. *J. Chem. Neuroanat.* *42*, 157–183.
- 608 Liben-nowell, D., and Kleinberg, J. (2007). The link-prediction problem for social networks.  
609 *J Am. Soc. Inf. Sci. Technol.*
- 610 Lü, L., and Zhou, T. (2011). Link prediction in complex networks: A survey. *Phys. Stat.*  
611 *Mech. Its Appl.* *390*, 1150–1170.
- 612 Majka, P., Bai, S., Bakola, S., Bednarek, S., Chan, J.M., Jermakow, N., Passarelli, L.,  
613 Reser, D.H., Theodoni, P., Worthy, K.H., et al. (2020). Open access resource for cellular-  
614 resolution analyses of corticocortical connectivity in the marmoset monkey. *Nat. Commun.*  
615 *11*, 1133.
- 616 Margulies, D.S., Ghosh, S.S., Goulas, A., Falkiewicz, M., Huntenburg, J.M., Langs, G.,  
617 Bezgin, G., Eickhoff, S.B., Castellanos, F.X., Petrides, M., et al. (2016). Situating the  
618 default-mode network along a principal gradient of macroscale cortical organization. *Proc.*  
619 *Natl. Acad. Sci.* *113*, 12574–12579.
- 620 Markov, N.T., Misery, P., Falchier, A., Lamy, C., Vezoli, J., Quilodran, R., Gariel, M.A.,  
621 Giroud, P., Ercsey-Ravasz, M., Pilaz, L.J., et al. (2011). Weight Consistency Specifies  
622 Regularities of Macaque Cortical Networks. *Cereb. Cortex* *21*, 1254–1272.
- 623 Markov, N.T., Ercsey-Ravasz, M., Van Essen, D.C., Knoblauch, K., Toroczkai, Z., and  
624 Kennedy, H. (2013a). Cortical high-density counterstream architectures. *Science* *342*,  
625 1238406.

- 626 Markov, N.T., Vezoli, J., Chameau, P., Falchier, A., Quilodran, R., Huissoud, C., Lamy,  
627 C., Misery, P., Giroud, P., Ullman, S., et al. (2013b). Anatomy of hierarchy: Feedforward  
628 and feedback pathways in macaque visual cortex. *J. Comp. Neurol.* 522, 225–259.
- 629 Markov, N.T., Ercsey-Ravasz, M., Lamy, C., Ribeiro Gomes, A.R., Magrou, L., Misery, P.,  
630 Giroud, P., Barone, P., Dehay, C., Toroczkai, Z., et al. (2013c). The role of long-range  
631 connections on the specificity of the macaque interareal cortical network. *Proc. Natl. Acad.*  
632 *Sci.* 110, 5187–5192.
- 633 Markov, N.T., Ercsey-Ravasz, M.M., Ribeiro Gomes, A.R., Lamy, C., Magrou, L., Vezoli,  
634 J., Misery, P., Falchier, A., Quilodran, R., Gariel, M.A., et al. (2014). A Weighted and  
635 Directed Interareal Connectivity Matrix for Macaque Cerebral Cortex. *Cereb. Cortex* 24,  
636 17–36.
- 637 McCulloch, W.S., and Pitts, W. (1943). A logical calculus of the ideas immanent in nervous  
638 activity. *Bull. Math. Biophys.* 5, 115–133.
- 639 Mesulam, M. (2012). The evolving landscape of human cortical connectivity: facts and  
640 inferences. *NeuroImage* 62, 2182–2189.
- 641 Milo, R., Itzkovitz, S., Kashtan, N., Levitt, R., Shen-Orr, S., Ayzenshtat, I., Sheffer, M., and  
642 Alon, U. (2004). Superfamilies of evolved and designed networks. *Science* 303, 1538–  
643 1542.
- 644 Mota, B., Santos, S.E.D., Ventura-Antunes, L., Jardim-Messeder, D., Neves, K., Kazu,  
645 R.S., Noctor, S., Lambert, K., Bertelsen, M.F., Manger, P.R., et al. (2019). White matter  
646 volume and white/gray matter ratio in mammalian species as a consequence of the  
647 universal scaling of cortical folding. *Proc. Natl. Acad. Sci.* 116, 15253–15261.
- 648 Nepusz, T., Négyessy, L., Tuszáný, G., and Bazsó, F. (2008). Reconstructing Cortical  
649 Networks: Case of Directed Graphs with High Level of Reciprocity. 325–368.
- 650 Peters, J.M., Taquet, M., Vega, C., Jeste, S.S., Fernández, I.S., Tan, J., Nelson, C.A.,  
651 Sahin, M., and Warfield, S.K. (2013). Brain functional networks in syndromic and non-  
652 syndromic autism: a graph theoretical study of EEG connectivity. *BMC Med.* 11, 54.
- 653 Røge, R., Ambrosen, K.S., Albers, K.J., Eriksen, C.T., Liptrot, M.G., Schmidt, M.N.,  
654 Madsen, K.H., and Mørup, M. (2017). Whole brain functional connectivity predicted by  
655 indirect structural connections. 2017 Int. Workshop Pattern Recognit. Neuroimaging PRNI  
656 2017 0–3.
- 657 Shen, K., Bezgin, G., Schirner, M., Ritter, P., Everling, S., and McIntosh, A.R. (2019). A  
658 macaque connectome for large-scale network simulations in TheVirtualBrain. *Sci. Data* 6,  
659 123.
- 660 Silva, S., de Pasquale, F., Vuillaume, C., Riu, B., Loubinoux, I., Geeraerts, T., Seguin, T.,  
661 Bounes, V., Fourcade, O., Demonet, J.-F., et al. (2015). Disruption of posteromedial large-  
662 scale neural communication predicts recovery from coma. *Neurology* 85, 2036–2044.
- 663 Song, H.F., Kennedy, H., and Wang, X.-J. (2014). Spatial embedding of structural  
664 similarity in the cerebral cortex. *Proc. Natl. Acad. Sci.* 111, 16580–16585.

- 665 Sporns, O., Tononi, G., and Kötter, R. (2005). The Human Connectome: A Structural  
666 Description of the Human Brain. *PLOS Comput. Biol.* 1, e42.
- 667 Theodoni, P., Majka, P., Reser, D.H., Wójcik, D.K., Rosa, M.G.P., and Wang, X.-J. (2020).  
668 Structural attributes and principles of the neocortical connectome in the marmoset  
669 monkey. *BioRxiv* 2020.02.28.969824.
- 670 Vezoli, J., Magrou, L., Goebel, R., Wang, X.-J., Knoblauch, K., Vinck, M., and Kennedy,  
671 H. (2021). Cortical hierarchy, dual counterstream architecture and the importance of top-  
672 down generative networks. *NeuroImage* 225, 117479.
- 673 Zingg, B., Hintiryan, H., Gou, L., Song, M.Y., Bay, M., Bienkowski, M.S., Foster, N.N.,  
674 Yamashita, S., Bowman, I., Toga, A.W., et al. (2014). Neural networks of the mouse  
675 neocortex. *Cell* 156, 1096–1111.
- 676



**Figure 1. Schematics for link prediction with retrograde tract-tracing data.** (A)  $k$ -fold cross-validation setup for predictability ( $k = 3$ ). (B) Links are predicted based on information (weights, distances) from the out-neighborhoods of its incident vertices.



680  
 681  
 682  
 683  
 684  
 685  
 686

**Figure 2. ROC curves for binary link prediction in the macaque.** Dashed lines are from CL predictors: CN-common neighbors, PA-preferential attachment, AA-Adamic-Adar, RA-resource allocation, JA-Jaccard index. The continuous lines are from the four best ML classifiers, based on the full FLN-plus-distance feature vectors: KNN - K-nearest neighbors, MLP – multilayer perceptron and RF – random forest, GB – gradient boosting, using  $k$ -fold cross-validation, with  $k = 3$ . The markers indicate the location of the maximum accuracy thresholds.



687  
 688  
 689  
 690  
 691  
 692  
 693  
 694  
 695  
 696  
 697  
 698  
 699  
 700

**Figure 3. Binary prediction heterogeneity in the macaque brain.** (A) Prediction error matrix for all known links (3-fold cross-validation) generated by GB. Vertical lines within the main diagonal boxes, separate targets (to the left of the line) from non-injected areas (to the right of the line). Red circles indicate strong links (with weights  $> 5$ ) with high prediction errors. Along with their weights  $w$  and their errors  $\epsilon$ , these are:  $V6 \rightarrow DP$  ( $w = 5.3, \epsilon = 0.75$ ),  $V6A \rightarrow 9/46d$  ( $w = 5.28, \epsilon = 0.69$ ),  $V6 \rightarrow LIP$  ( $w = 5.47, \epsilon = 0.79$ ),  $V4 \rightarrow 8l$  ( $w = 5.11, \epsilon = 0.87$ ),  $MT \rightarrow 8l$  ( $w = 5.33, \epsilon = 0.62$ ) and  $TEa/mp \rightarrow 9/46v$  ( $w = 5.3, \epsilon = 0.53$ ). Inset matrix shows inter-regional errors obtained by averaging errors within sub-matrices corresponding to cortical lobes. (B) Prediction errors as function of link weights and (C) as function of link projection distance. The vertical line in (B) at 0 are all the node pairs for which the prediction was *non-link*, while (C) contains all *links* and all *non-links*. The orange shaded areas in (B) and (C) represent one standard deviation from the average (orange line). The definition of error measure is given in the main text. Area abbreviations with corresponding area names and region assignments are provided in the SI Table S1.



701  
702 **Figure 4. Binary predictability as function of link weights.** Predictability from only (A) Strong  
703 links  $w_{ij} \geq 5$  (494 links), (B) Strong-&Medium  $w_{ij} \geq 3$  (1600 links), (C) Medium-&-Weak  $w_{ij} \leq 5$   
704 (3146 links) and (D) Weak links  $w_{ij} \leq 3$  (2040 links). The AUC values and errors in (A) KNN ( $0.67 \pm$   
705  $0.02$ ), MLP ( $0.77 \pm 0.03$ ), RF ( $0.77 \pm 0.02$ ), GB ( $0.75 \pm 0.02$ ), JA ( $0.70 \pm 0.02$ ); in (B) KNN ( $0.79 \pm$   
706  $0.02$ ), MLP ( $0.83 \pm 0.02$ ), RF ( $0.83 \pm 0.02$ ), GB ( $0.83 \pm 0.02$ ), JA ( $0.82 \pm 0.02$ ); in (C) KNN ( $0.67 \pm$   
707  $0.02$ ), MLP ( $0.62 \pm 0.04$ ), RF ( $0.67 \pm 0.03$ ), GB ( $0.64 \pm 0.03$ ), JA ( $0.62 \pm 0.04$ ); in (D) KNN ( $0.47 \pm$   
708  $0.03$ ), MLP ( $0.49 \pm 0.05$ ), RF ( $0.49 \pm 0.03$ ), GB ( $0.48 \pm 0.03$ ), JA ( $0.55 \pm 0.02$ ).





**Figure 6. Weighted prediction errors as function of link strength and distance**, using the prediction data from

**Figure 5.** (A) Relative mean absolute error RMAE vs link weight and (B) vs projection distance, in the macaque for every predicted link. (C) same as (A) and (D) same as (B), for the mouse. The continuous line is the mean value, the orange shaded area corresponds to one standard deviation. Panels do not contain data for no connections.



**Figure 7. Scaling of prediction errors as function of input data size in a leave-one-out analysis.** The relative mean prediction errors RMAE (of weights) are computed for areas internal to a set of  $m$  targets for both macaque (A) and mouse (B), then plotted as function of  $m$ , see main text for description. The errors are separated by link weight class. Note the logarithmic scale on the y-axis.

722 **Table 1. Prediction errors by link weight.** MAE: Mean Absolute Error  $|\Delta w| = |w_{\text{pred}} - w_{\text{true}}|$ ,  
 723 RMAE: Relative Mean Absolute Error  $|\Delta w|/w_{\text{true}}$ . For “non-links” only, for the relative error, we  
 724 used the estimated experimental lower cutoff value of  $w_{\text{true}} = w_{\text{cut}} = 0.9$ , corresponding to an  
 725  $FLN = 8 \times 10^{-7}$ .  
 726

| Non-links included                         | Macaque |       | Mouse |       | Mac/Mus    |
|--------------------------------------------|---------|-------|-------|-------|------------|
|                                            | MAE     | RMAE  | MAE   | RMAE  | RMAE ratio |
| Weak ( $w_{\text{cut}} < w < 3$ )          | 1.016   | 0.441 | 1.032 | 0.446 | 0.989      |
| Weak-&-Medium ( $w_{\text{cut}} < w < 5$ ) | 1.134   | 0.358 | 0.647 | 0.196 | 1.827      |
| Medium-&-Strong ( $w > 3$ )                | 1.227   | 0.282 | 0.565 | 0.127 | 2.220      |
| Strong ( $w > 5$ )                         | 1.272   | 0.228 | 0.569 | 0.102 | 2.235      |
| All links ( $w > w_{\text{cut}}$ )         | 1.164   | 0.330 | 0.622 | 0.166 | 1.988      |
| Non-links ( $w \leq w_{\text{cut}}$ )      | 1.382   | 1.039 | 2.911 | 2.288 | 0.454      |
| Both links and non-links                   | 1.246   | 0.591 | 0.683 | 0.222 | 2.662      |

727  
 728  
 729  
 730  
 731  
 732  
 733  
 734  
 735  
 736  
 737  
 738  
 739

**Table 2. Classical, neighborhood-based link predictors for directed and weighted networks.**  
 The formulas have been adapted to be based on the out-link neighborhood information of the endpoints ( $u, v$ ) of the directed link to be predicted. Each formula provides a prediction score  $s(u, v)$  for that directed link. Here  $I$  denotes the set of all target (injected) areas and  $\Gamma_0(u)$  denotes the neighbors of  $u$ , including itself.

| Method (abbreviation)         | Formula                                                                                                                                                   |
|-------------------------------|-----------------------------------------------------------------------------------------------------------------------------------------------------------|
| Common Neighbors v2 (CN2)     | $CN2(u, v) = \frac{1}{2} \sum_{z \in I} [w(z, u) + w(z, v)]$                                                                                              |
| Preferential Attachment (PA2) | $PA2(u, v) = \left( \frac{\sum_{z \in \Gamma_0(u)} w(z, u)}{ \Gamma_0(u) } \right) \left( \frac{\sum_{z \in \Gamma_0(v)} w(z, v)}{ \Gamma_0(v) } \right)$ |
| Adamic Adar v2 (AA2)          | $AA2(u, v) = \frac{1}{2} \left( \sum_{z \in I} \frac{w(z, u) + w(z, v)}{\log \sum_{x \in \Gamma_0(z)} w(x, z)} \right)$                                   |
| Resource Allocation v2 (RA2)  | $RA2(u, v) = \sum_{z \in I} \frac{w(z, u) + w(z, v)}{\sum_{x \in \Gamma_0(z)} w(x, z)}$                                                                   |
| Jaccard v2 (JA2)              | $JA2(u, v) = \frac{\sum_{z \in I} \min(w(z, u), w(z, v))}{\sum_{z \in I} \max(w(z, u), w(z, v))}$                                                         |

740  
 741

742  
743

**Table 3. Machine learning feature functions used to train our classifiers.**

| Feature                   | Formula                                                   |
|---------------------------|-----------------------------------------------------------|
| weighted_common_neighbors | $\sum_{i \in I} [A(i, u) + A(i, v)]$                      |
| degree_plus_distance      | $\{d(u), d(v), D(u, v)\}$                                 |
| adjacency                 | $\{A(i, u) > 0, A(i, v) > 0   \forall i \in I\}$          |
| outdistance_source        | $\{D(i, u)   \forall i \in I\}$                           |
| outdistance_target        | $\{D(i, v)   \forall i \in I\}$                           |
| outdistance               | $\{D(i, u), D(i, v)   \forall i \in I\}$                  |
| fln                       | $\{A(i, u), A(i, v)   \forall i \in I\}$                  |
| fln_plus_distance         | $\{A(i, u), A(i, v)   \forall i \in I\} \cup \{D(u, v)\}$ |

744  
745  
746
